# Supplementary material
Source: MDPI journal article supplement (https://www.mdpi.com/2306-5338/8/2/80)
Supplement: s1 [file s1]

Figure S1. General geology and cross-section A-A'. Elevation in meters relative to sea level (0 m).

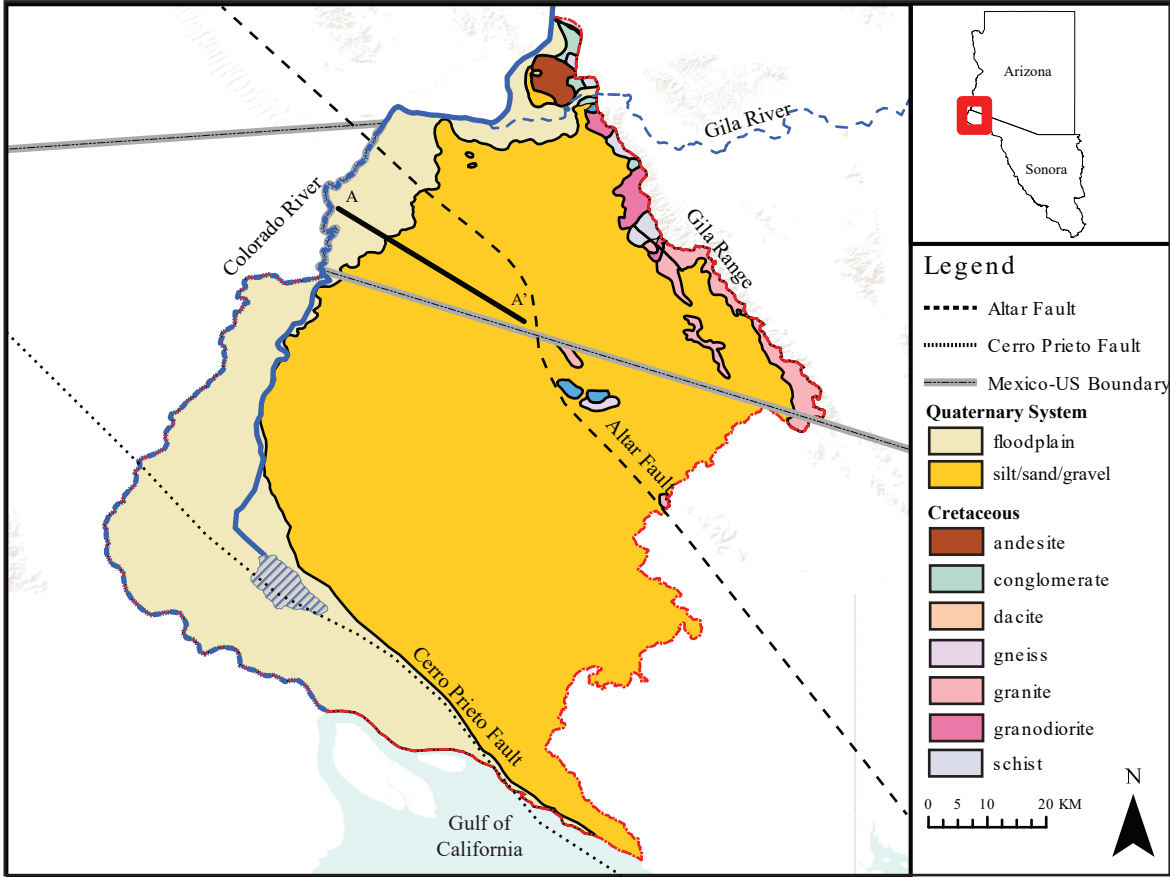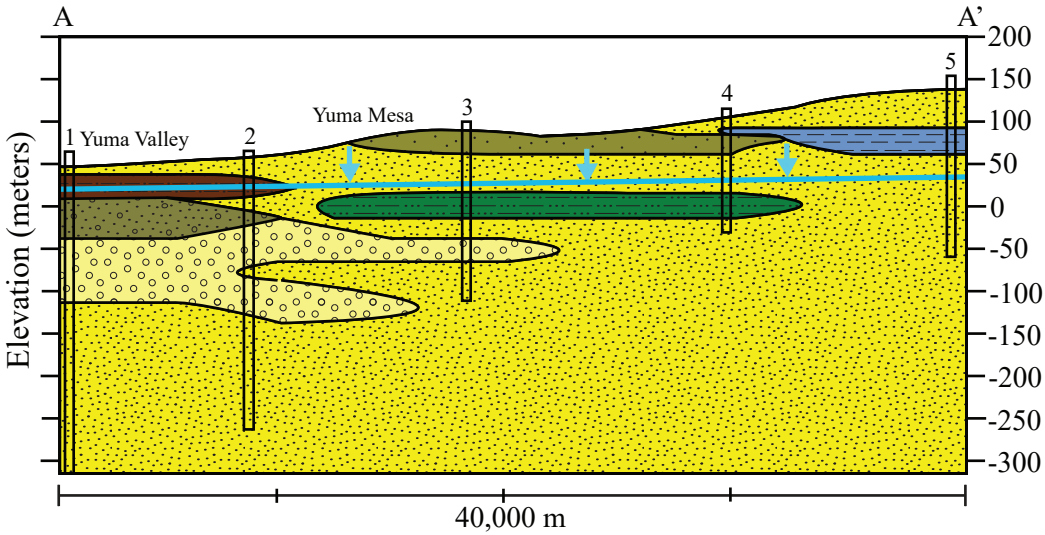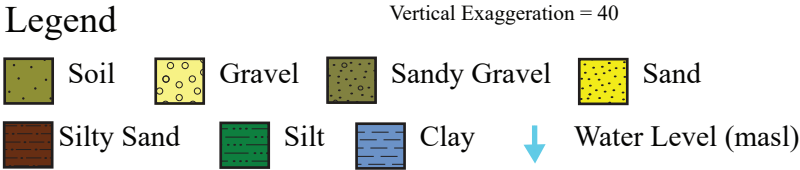

**Well Name:**

- 1: C-10-25 35 BBD1
- 2: C-11-24 23 BCB1
- 3: C-11-23 34 BBC1
- 4: C-12-22 09 BAB1
- 5: C-12-21 17 CBC1

Based on information from [9,17,25]

Table S1. Isotopic and chemical composition of waters in the study area.

| Site | Type    | Date   | Latitude | Longitude | Group   | T<br>(°C) | pH  | E.C<br>(mS/cm) | Ca <sup>2+</sup><br>(mg/L) | Mg <sup>2+</sup><br>(mg/L) | Na <sup>+</sup><br>(mg/L) | K <sup>+</sup><br>(mg/L) | Cl <sup>-</sup><br>(mg/L) | SO <sub>4</sub> <sup>2-</sup><br>(mg/L) | NO <sub>3</sub> <sup>-</sup><br>(mg/L) | Br <sup>-</sup><br>(mg/L) | HCO <sub>3</sub> <sup>-</sup><br>(mg/L) | δ <sup>18</sup> O<br>(‰) | δ <sup>2</sup> H<br>(‰) | δ <sup>13</sup> C<br>(‰) | <sup>14</sup> C<br>(pMC) | <sup>3</sup> H<br>(TU) | Source |    |
|------|---------|--------|----------|-----------|---------|-----------|-----|----------------|----------------------------|----------------------------|---------------------------|--------------------------|---------------------------|-----------------------------------------|----------------------------------------|---------------------------|-----------------------------------------|--------------------------|-------------------------|--------------------------|--------------------------|------------------------|--------|----|
| 1    | Surface | Oct-13 | 32.732   | -114.638  | CR      |           |     | 1.7            |                            |                            |                           |                          |                           | 220                                     | 351                                    | 4.2                       | 0.4                                     |                          | -11.8                   | -95                      | -12.0                    | 101                    | 7      | 29 |
|      | Surface | Feb-17 | 32.732   | -114.638  | CR      |           |     |                |                            |                            |                           |                          |                           |                                         |                                        |                           |                                         |                          | -11.4                   | -95                      |                          |                        | 5.3    | 29 |
| 2    | Surface | May-13 | 32.728   | -114.634  | WMD     |           |     | 3.9            |                            |                            |                           |                          |                           | 639                                     | 821                                    | 20.5                      | 1.0                                     |                          | -10.6                   | -87                      |                          |                        |        | 29 |
| 3    | Well    | Jun-67 | 32.748   | -114.533  | CRFP    |           | 7.3 | 3.0            | 170                        | 62                         |                           |                          |                           | 660                                     | 238                                    |                           |                                         | 312                      |                         |                          |                          |                        |        | 16 |
|      | Well    | May-80 |          |           | CRFP    |           |     |                | 200                        | 68                         | 410                       | 8                        | 660                       | 370                                     |                                        |                           |                                         | 367                      | -10.5                   | -84                      |                          |                        |        | 16 |
| 4    | Well    | May-80 | 32.715   | -114.595  | CRFP    |           |     |                | 313                        | 120                        | 520                       | 6                        | 930                       | 650                                     |                                        |                           |                                         | 563                      | -11.6                   | -92                      |                          |                        |        | 16 |
| 5    | Well    | Mar-63 | 32.714   | -114.561  | CRFP    | 22        | 7.7 | 2.2            | 127                        | 43                         |                           |                          |                           | 408                                     | 272                                    | 1.2                       |                                         | 329                      |                         |                          |                          |                        |        | 16 |
|      | Well    | May-80 |          |           | CRFP    | 22        |     |                | 150                        | 50                         | 310                       | 6                        | 540                       | 290                                     |                                        |                           |                                         | 244                      | -10.3                   | -78                      |                          |                        |        | 16 |
| 6    | Well    | Apr-05 | 32.709   | -114.551  | CRFP    | 22        | 7.5 | 3.3            | 180                        | 69                         | 414                       | 7                        | 640                       | 410                                     | 0.1                                    |                           |                                         | 362                      | -9.4                    | -75                      |                          |                        | 5      | 10 |
| 7    | Well    | Apr-05 | 32.709   | -114.605  | CRFP    | 25        | 7.4 | 4.5            | 218                        | 89                         | 719                       | 7                        | 927                       | 831                                     | 0.1                                    |                           |                                         | 398                      | -10.6                   | -86                      |                          |                        | 16     | 10 |
| 8    | Well    | Apr-05 | 32.679   | -114.539  | CRFP    | 24        | 7.6 | 1.9            | 56                         | 20                         | 377                       | 4                        | 175                       | 399                                     | 8.0                                    |                           |                                         | 317                      | -11.6                   | -96                      |                          |                        | 13     | 10 |
| 9    | Well    | Apr-05 | 32.678   | -114.426  | G.RANGE | 27        | 7.7 | 1.6            | 92                         | 30                         | 179                       | 6                        | 354                       | 90                                      | 0.1                                    | 2.8                       |                                         | 148                      | -8.5                    | -67                      |                          |                        | 2      | 10 |
| 10   | Well    | Aug-87 | 32.678   | -114.430  | G.RANGE |           |     |                | 75                         | 33                         | 370                       | 5                        | 620                       | 110                                     | 0.4                                    |                           |                                         | 172                      | -8.5                    | -66                      |                          |                        |        | 16 |
| 11   | Well    | Aug-87 | 32.677   | -114.409  | G.RANGE |           |     |                | 1.4                        | 60                         | 34                        | 160                      | 6                         | 270                                     | 82                                     | 8.8                       |                                         | 196                      | -7.6                    | -55                      |                          |                        |        | 16 |
| 12   | Well    | Apr-05 | 32.666   | -114.644  | CRFP    | 27        | 7.3 | 3.7            | 221                        | 68                         | 499                       | 8                        | 531                       | 879                                     | 0.2                                    |                           |                                         | 293                      | -11.1                   | -90                      | -9.0                     | 70                     | 14     | 10 |
| 13   | Well    | May-80 | 32.635   | -114.764  | CRFP    | 22        | 7.9 | 2.2            | 200                        | 51                         | 220                       | 6                        | 230                       | 550                                     |                                        | 0.6                       |                                         | 434                      | -12.8                   | -104                     |                          |                        |        | 16 |
| 14   | Well    | Sep-05 | 32.620   | -114.505  | G.RANGE |           | 7.7 | 2.1            | 57                         | 20                         | 331                       | 5                        | 432                       | 181                                     | 3.5                                    |                           |                                         | 224                      | -8.7                    | -67                      |                          |                        | 0.2    | 10 |
| 15   | Well    | Apr-05 | 32.620   | -114.651  | CRFP    | 27        | 7.3 | 2.2            | 117                        | 34                         | 285                       | 5                        | 327                       | 377                                     | 1.5                                    |                           |                                         | 258                      | -10.5                   | -84                      |                          |                        | 10     | 10 |
| 16   | Well    | May-62 | 32.585   | -114.796  | CRFP    |           | 7.6 | 1.3            | 107                        | 30                         |                           |                          |                           | 143                                     | 160                                    |                           |                                         | 300                      |                         |                          |                          |                        |        | 16 |
|      | Well    | Aug-62 |          |           | CRFP    |           | 7.2 | 1.2            | 105                        | 29                         |                           |                          |                           | 132                                     | 175                                    |                           |                                         | 295                      |                         |                          |                          |                        |        | 16 |
|      | Well    | Oct-62 |          |           | CRFP    |           | 7.2 | 1.2            | 96                         | 28                         |                           |                          |                           | 137                                     | 150                                    |                           |                                         | 288                      |                         |                          |                          |                        |        | 16 |
|      | Well    | Apr-64 |          |           | CRFP    |           | 7.4 | 1.3            | 118                        | 26                         |                           |                          |                           | 150                                     | 185                                    |                           |                                         | 304                      |                         |                          |                          |                        |        | 16 |
|      | Well    | May-65 |          |           | CRFP    |           | 7.7 | 1.3            | 118                        | 31                         |                           |                          |                           | 168                                     | 175                                    |                           |                                         | 318                      |                         |                          |                          |                        |        | 16 |
|      | Well    | Feb-67 |          |           | CRFP    |           | 7.7 | 1.4            | 116                        | 34                         |                           |                          |                           | 172                                     | 175                                    |                           |                                         | 320                      |                         |                          |                          |                        |        | 16 |
|      | Well    | Mar-67 |          |           | CRFP    |           | 7.7 | 1.4            | 118                        | 33                         |                           |                          |                           | 168                                     | 183                                    |                           |                                         | 308                      |                         |                          |                          |                        |        | 16 |
|      | Well    | May-80 |          |           | CRFP    | 21        | 8.2 | 1.9            | 161                        | 45                         | 170                       | 6                        | 260                       | 320                                     | 0.0                                    | 0.7                       |                                         | 296                      | -14.3                   | -108                     |                          |                        |        | 16 |
|      | Well    | Jul-88 |          |           | CRFP    | 22        | 7.6 | 2.0            | 160                        | 50                         | 190                       | 4                        | 270                       | 340                                     | 0.4                                    |                           |                                         | 328                      |                         |                          |                          |                        |        | 16 |
| 17   | Well    | Sep-05 | 32.557   | -114.676  | MESA    | 24        | 7.5 | 1.9            | 87                         | 32                         | 280                       | 4                        | 195                       | 425                                     | 3.0                                    |                           |                                         | 310                      | -11.8                   | -97                      |                          |                        | 14.1   | 10 |
|      | Well    | Sep-05 |          |           | MESA    |           | 7.6 | 2.0            | 92                         | 33                         | 265                       | 4                        | 206                       | 433                                     | 2.7                                    |                           |                                         |                          | -11.8                   | -97                      |                          |                        | 15.9   | 10 |
|      | Well    | Sep-05 |          |           | MESA    |           | 7.7 | 1.9            | 91                         | 29                         | 262                       | 4                        | 172                       | 416                                     | 3.5                                    |                           |                                         |                          | -11.8                   | -97                      |                          |                        | 16.1   | 10 |
|      | Well    | Sep-05 |          |           | MESA    |           | 8.1 | 1.8            | 90                         | 30                         | 258                       | 4                        | 158                       | 419                                     | 3.6                                    |                           |                                         |                          | -11.8                   | -99                      |                          |                        | 15     | 10 |
| 18   | Well    | Aug-87 | 32.549   | -114.593  | MESA    |           | 7.9 | 2.5            | 140                        | 46                         | 300                       | 5                        | 570                       | 220                                     | 11.4                                   |                           |                                         | 144                      | -8.0                    | -65                      |                          |                        |        | 16 |
| 19   | Well    | Aug-87 | 32.545   | -114.684  | MESA    | 27        | 7.5 | 2.2            | 87                         | 40                         | 320                       | 4                        | 430                       | 330                                     | 2.2                                    |                           |                                         | 184                      | -8.5                    | -76                      |                          |                        |        | 16 |
| 20   | Well    | Apr-05 | 32.487   | -114.753  | MESA    | 26        | 7.5 | 1.7            | 166                        | 38                         | 162                       | 4                        | 242                       | 294                                     | 0.1                                    |                           |                                         | 262                      | -13.8                   | -108                     |                          |                        | 8      | 10 |
| 21   | Well    | Apr-05 | 32.469   | -114.692  | MESA    | 27        | 7.7 | 2.4            | 148                        | 37                         | 288                       | 7                        | 529                       | 226                                     | 0.6                                    |                           |                                         | 152                      | -13.0                   | -101                     | -11.0                    | 59                     | <0.1   | 10 |
| 22   | Well    | Apr-05 | 32.445   | -114.596  | MESA    | 32        | 8.0 | 1.6            | 44                         | 12                         | 230                       | 6                        | 371                       | 71                                      | 0.1                                    |                           |                                         | 95                       | -7.9                    | -62                      | -9.0                     | 29                     | 0.1    | 10 |
| 23   | Well    | Apr-09 | 32.490   | -114.809  | CRFP    | 22        | 7.2 | 1.8            | 32                         | 69                         | 243                       | 4                        | 358                       | 390                                     |                                        |                           |                                         | 182                      | -12.0                   | -96                      |                          |                        |        | 28 |
| 24   | Well    | Apr-09 | 32.487   | -114.791  | CRFP    | 25        | 7.7 | 1.3            | 50                         | 71                         | 191                       | 3                        | 229                       | 220                                     |                                        |                           |                                         | 255                      | -14.3                   | -108                     |                          |                        |        | 28 |
| 25   | Well    | Apr-09 | 32.474   | -114.897  | CRFP    | 22        | 7.1 | 1.8            | 44                         | 88                         | 189                       | 4                        | 270                       | 380                                     |                                        |                           |                                         | 343                      | -12.4                   | -99                      |                          |                        |        | 28 |
| 26   | Well    | Apr-09 | 32.473   | -114.902  | CRFP    | 21        | 7.1 | 2.3            | 68                         | 100                        | 254                       | 4                        | 380                       | 520                                     |                                        |                           |                                         | 370                      | -11.8                   | -94                      |                          |                        |        | 28 |
| 27   | Well    | Apr-09 | 32.468   | -114.852  | CRFP    | 20        | 7.0 | 2.0            | 76                         | 75                         | 336                       | 4                        | 353                       | 450                                     |                                        |                           |                                         | 309                      | -12.0                   | -95                      |                          |                        |        | 28 |
| 28   | Well    | Apr-09 | 32.467   | -114.886  | CRFP    | 22        | 7.4 | 1.9            | 42                         | 67                         | 270                       | 3                        | 210                       | 360                                     |                                        |                           |                                         | 295                      | -11.9                   | -96                      |                          |                        |        | 28 |
| 29   | Well    | Apr-09 | 32.466   | -114.917  | CRFP    | 22        | 6.9 | 2.9            | 109                        | 116                        | 270                       | 5                        | 364                       | 500                                     |                                        |                           |                                         | 342                      | -13.3                   | -103                     |                          |                        |        | 28 |
| 30   | Well    | Apr-09 | 32.465   | -114.830  | CRFP    | 22        | 7.1 | 2.4            | 54                         | 73                         | 358                       | 4                        | 355                       | 450                                     |                                        |                           |                                         | 391                      | -11.8                   | -95                      |                          |                        |        | 28 |
| 31   | Well    | Apr-09 | 32.457   | -114.895  | CRFP    | 24        | 6.6 | 2.7            | 66                         | 98                         | 237                       | 5                        | 394                       | 430                                     |                                        |                           |                                         | 366                      | -14.0                   | -108                     |                          |                        |        | 28 |
| 32   | Well    | Mar-15 | 32.455   | -114.690  | MESA    |           |     |                |                            |                            |                           |                          |                           |                                         |                                        |                           |                                         |                          | -11.0                   | -83                      | -10.1                    |                        |        |    |
| 33   | Well    | Apr-09 | 32.448   | -114.920  | CRFP    | 22        | 7.0 | 1.3            | 34                         | 54                         | 194                       | 2                        | 220                       | 190                                     |                                        |                           |                                         | 300                      | -14.7                   | -112                     |                          |                        |        | 28 |
| 34   | Well    | Apr-09 | 32.447   | -114.824  | CRFP    | 24        | 7.3 | 1.6            | 28                         | 76                         | 222                       | 3                        | 281                       | 290                                     |                                        |                           |                                         | 313                      | -14.2                   | -108                     |                          |                        |        | 28 |
| 35   | Well    | Apr-09 | 32.446   | -114.878  | CRFP    | 22        | 7.0 | 2.9            | 76                         | 68                         | 316                       | 4                        | 434                       | 404                                     |                                        |                           |                                         | 420                      | -13.4                   | -105                     |                          |                        |        | 28 |
| 36   | Well    | Apr-09 | 32.445   | -114.908  | CRFP    | 21        | 6.9 | 3.7            | 108                        | 71                         | 452                       | 5                        | 646                       | 500                                     |                                        |                           |                                         | 466                      | -13.9                   | -107                     |                          |                        |        | 28 |
| 37   | Well    | Apr-09 | 32.444   | -114.884  | CRFP    | 21        | 7.0 | 2.5            | 78                         | 91                         | 296                       | 4                        | 401                       | 530                                     |                                        |                           |                                         | 361                      | -14.0                   | -109                     |                          |                        |        | 28 |
| 38   | Well    | Apr-09 | 32.443   | -114.884  | CRFP    | 23        | 7.6 | 0.9            | 40                         | 54                         | 128                       | 2                        | 133                       | 110                                     |                                        |                           |                                         | 295                      | -14.5                   | -111                     |                          |                        |        | 28 |
| 39   | Well    | Apr-09 | 32.434   | -114.834  | CRFP    | 21        | 7.1 | 2.3            | 76                         | 78                         | 288                       | 4                        | 341                       | 450                                     |                                        |                           |                                         | 372                      | -13.8                   | -106                     |                          |                        |        | 28 |
| 40   | Well    | Dec-74 | 32.432   | -114.615  | MESA    |           |     |                | 65                         | 23                         | 239                       |                          | 433                       | 82                                      |                                        |                           |                                         | 107                      | -9.1                    | -71                      |                          |                        |        | 7  |
| 41   | Well    | Apr-09 | 32.429   | -114.853  | CRFP    | 20        | 7.5 | 1.5            | 62                         | 69                         | 218                       | 3                        | 233                       | 280                                     |                                        |                           |                                         | 318                      | -14.2                   | -103                     |                          |                        |        | 28 |
| 42   | Well    | Apr-09 | 32.428   | -114.928  | CRFP    | 20        | 7.2 | 3.8            | 60                         | 113                        | 434                       | 5                        | 688                       | 620                                     |                                        |                           |                                         | 281                      | -13.4                   | -104                     |                          |                        |        | 28 |
| 43   | Well    | Dec-74 | 32.378   | -114.687  | MESA    |           |     |                | 64                         | 21                         | 156                       |                          | 188                       | 124                                     |                                        |                           |                                         | 243                      | -14.9                   | -114                     |                          |                        | <0.5   | 7  |
| 44   | Well    | Dec-74 | 32.415   | -114.622  | MESA    |           |     |                | 62                         | 35                         | 240                       |                          | 458                       | 87                                      |                                        |                           |                                         | 114                      | -9.3                    | -73                      |                          |                        | <0.5   | 7  |
| 45   | Well    | Apr-09 | 32.423   | -114.921  | CRFP    | 23        | 7.2 | 2.5            | 96                         | 97                         | 205                       | 4                        | 401                       | 410                                     |                                        |                           |                                         | 354                      | -14.3                   | -110                     |                          |                        |        | 28 |
| 46   | Well    | Apr-09 | 32.422   | -114.841  | CRFP    | 22        | 7.0 | 3.5            | 82                         | 91                         | 322                       | 5                        | 553                       | 470                                     |                                        |                           |                                         | 347                      | -13.5                   | -105                     |                          |                        |        | 28 |
| 47   | Well    | Apr-09 | 32.416   | -114.845  | CRFP    | 23        | 7.2 | 2.4            | 66                         | 53                         | 155                       | 3                        | 235                       | 290                                     |                                        |                           |                                         | 284                      | -14.1                   | -109                     |                          |                        |        | 28 |
| 48   | Well    | Apr-09 | 32.414   | -114.940  | CRFP    | 24        | 7.2 | 2.8            | 78                         | 98                         | 312                       | 4                        | 501                       | 560                                     |                                        |                           |                                         | 325                      | -13.3                   | -105                     |                          |                        |        | 28 |
| 49   | Well    | Apr-09 | 32.413   | -114.859  | CRFP    | 23        | 7.2 | 2.4            | 76                         | 79                         | 245                       | 4                        | 397                       | 370                                     |                                        |                           |                                         | 356                      | -14.0                   | -107                     |                          |                        |        | 28 |
| 50   | Well    | Dec-74 | 32.420   | -114.636  | MESA    |           |     |                | 100                        | 33                         | 269                       |                          | 533                       | 136                                     |                                        |                           |                                         | 110                      | -10.2                   | -79                      |                          |                        |        | 7  |
| 51   | Well    | Apr-09 | 32.410   | -114.904  | CRFP    | 25        | 7.1 | 1.2            | 52                         | 56                         | 137                       | 3                        | 199                       | 200                                     |                                        |                           |                                         | 290                      | -14.3                   | -110                     |                          |                        |        | 28 |
| 52   | Well    | Apr-09 | 32.409   | -114.881  | CRFP    | 22        | 7.2 | 1.4            | 58                         | 57                         | 173                       | 3                        | 247                       | 290                                     |                                        |                           |                                         | 290                      | -13.9                   | -108                     |                          |                        |        | 28 |
| 53   | Well    | Apr-09 | 32.405   | -114.929  | CRFP    | 20        | 7.5 | 1.0            | 22                         | 27                         | 137                       | 5                        | 156                       | 90                                      |                                        |                           |                                         | 209                      | -14.4                   | -110                     |                          |                        |        | 28 |
| 54   | Well    | Apr-09 | 32.397   | -114.910  | CRFP    | 22        | 7.3 | 1.9            | 50                         | 60                         | 221                       | 3                        | 312                       | 310                                     |                                        |                           |                                         | 309                      | -14.2                   | -109                     |                          |                        |        | 28 |
| 55   | Well    | Apr-09 | 32.397   | -114.940  | CRFP    | 21        | 7.0 | 1.5            | 52                         | 60                         | 139                       | 3                        | 260                       | 220                                     |                                        |                           |                                         | 281                      | -13.9                   | -108                     |                          |                        |        | 28 |
| 56   | Well    | Dec-74 | 32.397   | -114.748  |         |           |     |                |                            |                            |                           |                          |                           |                                         |                                        |                           |                                         |                          |                         |                          |                          |                        |        |    |

|    |         |        |        |          |      |    |     |      |     |    |     |    |       |      |      |       |       |       |       |       |
|----|---------|--------|--------|----------|------|----|-----|------|-----|----|-----|----|-------|------|------|-------|-------|-------|-------|-------|
| 64 | Well    | Apr-09 | 32.375 | -114.883 | CRFP | 25 | 7.4 | 2.3  | 66  | 52 | 257 | 4  | 422   | 220  |      | 265   | -14.0 | -107  |       | 28    |
| 65 | Tap     | Mar-15 | 32.371 | -114.761 | MESA |    |     |      |     |    |     |    |       |      |      |       | -13.9 | -105  | -10.2 |       |
| 66 | Well    | Apr-09 | 32.359 | -114.929 | CRFP | 23 | 7.7 | 1.4  | 36  | 35 | 208 | 3  | 257   | 220  |      | 262   | -14.2 | -109  |       | 28    |
| 67 | Well    | Oct-13 | 32.136 | -114.924 | CRFP |    |     | 3.7  |     |    |     |    | 1006  | 298  | 0.0  | 2.7   | -9.6  | -76   |       |       |
| 68 | Surface | May-13 | 32.062 | -114.904 | SURF |    |     | 5.4  |     |    |     |    | 1149  | 827  | 10.8 | 2.3   | -9.6  | -81   |       | 29    |
| 69 | Surface | Jul-14 | 32.057 | -114.899 | SURF | 30 | 7.9 | 2.9  |     |    |     |    | 558   | 782  | 22.9 | 1.0   | 305   | -10.6 | -88   | -8.7  |
|    | Surface | May-13 |        |          | SURF |    |     | 3.8  |     |    |     |    | 603   | 837  | 17.7 | 1.0   |       | -10.6 | -87   |       |
| 70 | Surface | Oct-13 | 32.039 | -114.822 | SURF |    |     | 3.6  |     |    |     |    | 975   | 251  | 0.0  | 2.5   |       | -6.7  | -66   |       |
| 71 | Surface | Jul-14 | 32.039 | -114.908 | SURF | 35 | 7.6 | 4.9  |     |    |     |    | 906   | 1028 | 0.0  | 1.5   | 318   | -8.6  | -77   | -7.9  |
|    | Surface | May-13 |        |          | SURF |    |     | 5.9  |     |    |     |    | 1259  | 1263 | 1.5  | 2.1   |       | -7.4  | -73   |       |
| 72 | Surface | Jul-14 | 32.038 | -114.895 | SURF | 35 | 7.6 | 3.6  |     |    |     |    | 550   | 771  | 19.2 | 1.0   | 297   | -10.5 | -88   | -8.1  |
| 73 | Surface | Jul-14 | 32.025 | -114.872 | SURF | 27 | 7.3 | 2.3  |     |    |     |    | 654   | 868  | 3.8  | 1.1   | 348   | -10.2 | -85   | -10.3 |
|    | Surface | May-13 |        |          | SURF |    |     | 6.0  |     |    |     |    | 1184  | 1323 | 0.0  | 2.2   |       | -8.1  | -74   |       |
| 74 | Surface | Jul-14 | 32.015 | -114.868 | SURF | 28 | 7.6 | 3.6  |     |    |     |    | 728   | 944  | 0.0  | 1.2   | 346   | -9.8  | -83   | -7.9  |
| 75 | Surface | May-13 | 31.988 | -114.827 | SURF |    |     | 6.0  |     |    |     |    | 1182  | 1346 | 0.0  | 2.5   |       | -7.3  | -69   |       |
|    | Surface | Jul-14 |        |          | SURF | 37 | 8.2 | 27.9 |     |    |     |    | 7425  | 4960 | 10.5 | 16.9  | 324   | -0.4  | -28   | -3.8  |
| 76 | Surface | May-13 | 31.965 | -114.814 | SURF |    |     | 12.5 |     |    |     |    | 2848  | 2597 | 0.0  | 5.8   |       | -1.1  | -39   | -     |
|    | Surface | Jul-14 |        |          | SURF | 28 | 7.5 | 144  |     |    |     |    | 44933 | 8249 | 0.0  | 181.8 | 341   | 0.7   | -17   | -5.5  |
| 77 | Surface | May-13 | 31.958 | -114.811 | SURF |    |     | 146  |     |    |     |    | 54492 | 9653 | 0.0  | 119.9 |       | 6.0   | 8     |       |
| 78 | Well    | Jan-82 | 32.350 | -114.531 | MESA | 32 | 7.3 |      | 34  | 10 | 270 | 6  | 270   | 270  |      | 0.5   | 150   | -10.5 | -77   | -8.1  |
| 79 | Well    | Jan-82 | 32.378 | -114.688 | MESA | 30 | 7.7 |      | 57  | 17 | 210 | 6  | 340   | 140  |      | 0.5   | 120   | -12.7 | -93   | -10.8 |
| 80 | Well    | Apr-78 | 32.428 | -114.599 | MESA | 28 | 7.9 |      | 49  | 13 | 220 | 9  | 400   | 79   |      | 0.6   | 98    | -8.6  | -63   | -9.7  |
| 81 | Well    | Apr-78 | 32.387 | -114.718 | MESA | 31 | 7.3 |      | 43  | 11 | 170 | 10 | 250   | 130  |      | 0.2   | 130   | -14.1 | -104  | -11.2 |
| 82 | Well    | Apr-78 | 32.387 | -114.718 | MESA | 29 | 7.4 |      | 45  | 10 | 120 | 7  | 180   | 130  |      | 0.5   | 160   | -14.8 | -111  | -11.5 |
| 83 | Well    | Apr-78 | 32.457 | -114.690 | MESA | 28 | 7.7 |      | 110 | 27 | 230 | 5  | 430   | 160  |      | 1.5   | 160   | -12.5 | -94   | -11.3 |
| 84 | Well    | Oct-16 | 32.457 | -114.690 | MESA |    | 7.3 | 1.8  | 93  | 23 | 224 | 5  | 416   | 157  | 0.0  | 0.5   | 328   | -12.7 | -98   |       |
| 85 | Well    | Oct-16 | 32.450 | -114.674 | MESA |    | 7.5 | 2.1  | 100 | 28 | 230 | 7  | 516   | 142  | 0.0  | 0.0   | 185   | -10.9 | -85   |       |
| 86 | Well    | Oct-16 | 32.446 | -114.660 | MESA | 29 | 7.5 | 1.9  | 92  | 27 | 216 | 7  | 511   | 112  | 0.0  | 0.0   | 198   | -9.4  | -72   |       |
| 87 | Well    | Oct-16 | 32.441 | -114.645 | MESA | 29 | 7.5 | 1.8  | 88  | 20 | 216 | 6  | 464   | 99   | 0.0  | 0.0   | 104   | -9.8  | -75   |       |
| 88 | Well    | Oct-16 | 32.437 | -114.630 | MESA | 32 | 7.7 | 1.6  | 69  | 14 | 204 | 5  | 422   | 89   | 0.0  | 0.4   | 109   | -9.3  | -72   | <0.5  |
|    | Well    | Oct-16 |        |          | MESA | 30 | 7.7 | 1.5  | 58  | 14 | 217 | 5  | 398   | 81   | 0.3  | 0.6   | 64    | -8.7  | -65   |       |
| 89 | Well    | Oct-16 | 32.423 | -114.585 | MESA | 31 | 7.6 | 1.4  | 36  | 9  | 203 | 4  | 346   | 76   | 0.0  | 0.4   | 73    | -7.9  | -60   | -9.4  |
| 90 | Well    | Oct-16 | 32.419 | -114.570 | MESA | 30 | 7.6 | 1.3  | 31  | 9  | 202 | 3  | 319   | 69   | 0.0  | 0.4   | 144   | -8.0  | -60   | 26    |
| 91 | Well    | Oct-16 | 32.343 | -114.321 | MESA | 33 | 7.6 | 3.6  | 91  | 7  | 549 | 4  | 840   | 491  | 2.4  | 1.7   | 110   | -8.6  | -63   | <0.4  |
|    | Rain    | Apr-16 |        |          | RF   |    |     |      |     |    |     |    | 9     | 6    | 0.1  | 0.1   |       | -7.0  | -39   |       |
|    | Rain    | Apr-16 |        |          | RF   |    |     |      |     |    |     |    | 8     | 5    | 0.1  | 0.0   |       | -4.4  | -24   |       |
|    | Rain    | Apr-16 |        |          | RF   |    |     |      |     |    |     |    | 60    | 11   | 0.3  | 0.2   |       | -3.7  | -21   |       |

$\delta^{18}\text{O}$  and  $\delta^2\text{H}$  relative to V-SMOW (‰).  $\delta^{13}\text{C}$  relative to V-PDB (‰)

7. Payne, B.R.; Quijano, L.; Carlos, L.D. Environmental isotopes in a study of the origin of salinity of groundwater in the Mexicali Valley. *J. of Hydrology* **1979**, *41*, 201–215.

DOI: 10.1016/0022-1694(79)90062-3

10. Dickinson, J.; Land, M.; Faunt, C.; Leake, S.; Richard, E.; Fleming, J.B.; Pool, D.R. Hydrologic Framework Refinement, Ground-Water Flow and Storage, Water-Chemistry Analyses and Water-Budget Components of the Yuma Area, Southwestern Arizona, and Southeastern California. U.S.G.S Sci. Inv. Rep. 2006, 5135, 1–88.

17. U.S.G.S.: Water-Quality Data for the Nation. Available online: <https://waterdata.usgs.gov/nwis> (Accessed on 12 December 2020).

29. Palomares-Ramírez, R.B. Identificación de los componentes hidrogeoquímicos que contaminan el acuífero del Módulo de Riego I del Valle de San Luis, R.C. Master's Thesis, Universidad Autónoma de Baja California, Mexicali, México, December 2011.

30. Zamora, H.A.; Wilder, T.W.; Eastoe, C.J.; McIntosh, J.C.; Welker, J.; Flessa, K.W. Evaluation of Groundwater Sources, Flow Paths, and Residence Time of the Gran Desierto Pozos, Sonora, Mexico. *Geosciences* **2019**, *9*, 378. DOI: 10.3390/geosciences9090378

31. Makdisi, R.S.; Truesdell, A.H.; Thompson, J.M.; Coplen, T.B.; Sanchez, R. Geochemical evolution of Mexicali Valley groundwaters. Symposium on the Cerro Prieto Geothermal Field, Guadalajara, Mexico, August 10th, 1982.
